# Supplementary figures and images for: General Methods for Evolutionary Quantitative Genetic Inference from Generalized Mixed Models
Source: Oxford University Press journal article supplement (doi:10.1534/genetics.115.186536), 2016-09-03

**GLMM**

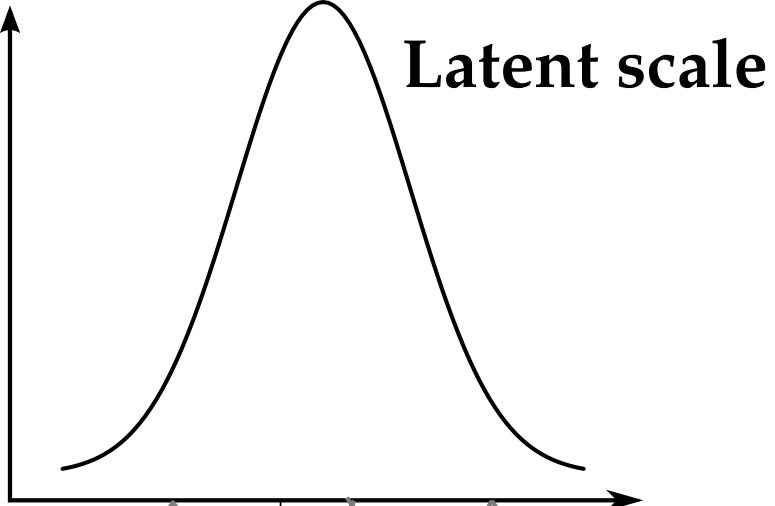

**Threshold Model**

Expected data scale

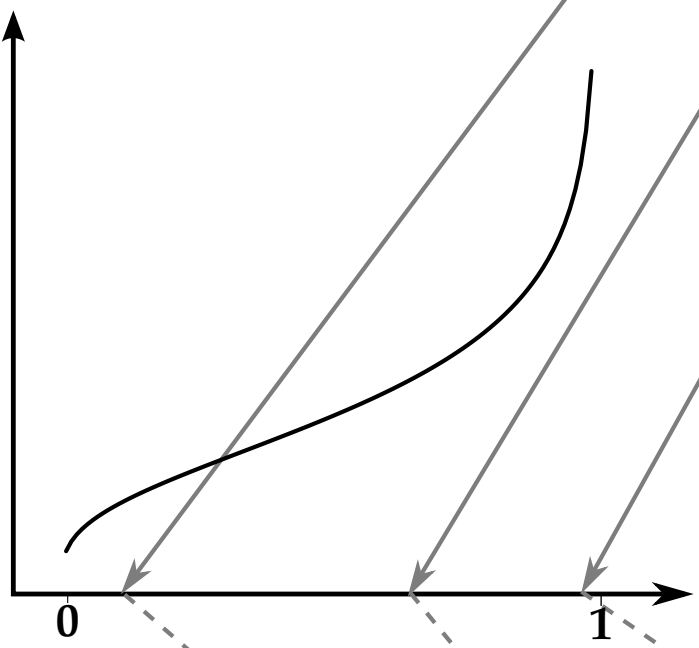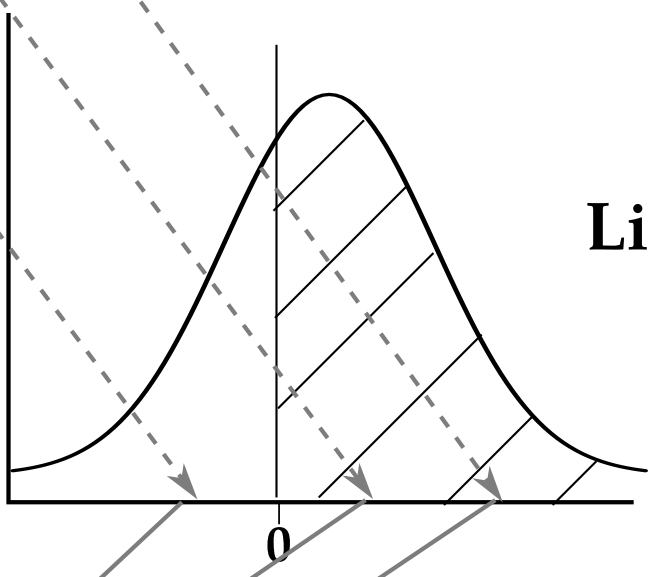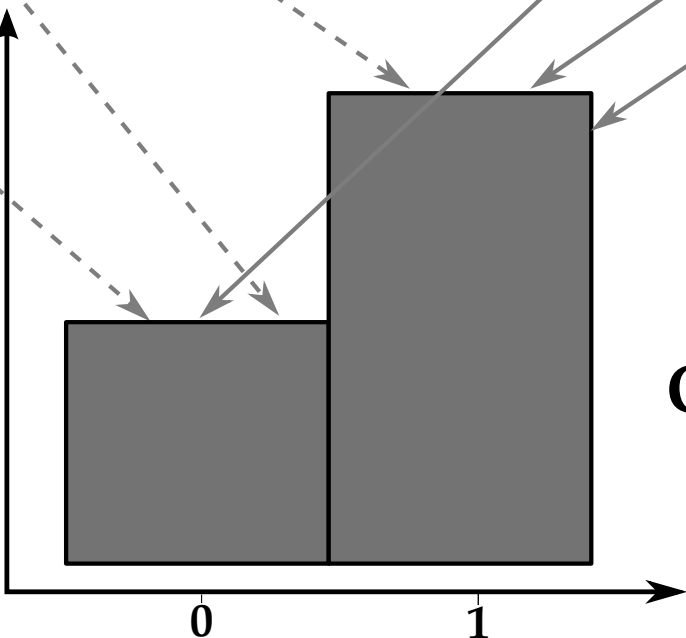

Supplement: figures1.pdf [file figures1.pdf]
